# Supplementary material for: Unconventional Radical and Radical-Hole Site-Based Interactions in Halogen-Bearing Dimers and Trimers: A Comparative Study
Source: PubMed Central journal article supplement — ACS Omega. 2024 Sep 5;9(37):38743–52. doi: 10.1021/acsomega.4c04620 (PMC11411553; doi:10.1021/acsomega.4c04620), 2024-09-05
Supplement: ao4c04620_si_001.pdf [file ao4c04620_si_001.pdf]

# **Unconventional Radical and Radical-Hole Site-Based Interactions in Halogen-Bearing Dimers and Trimers: A Comparative Study**

Mahmoud A. A. Ibrahim<sup>1,2\*</sup>, Heba S. M. Abd Elhafez<sup>1</sup>, Mohammed N. I. Shehata<sup>1</sup>, Nayra A. M. Moussa<sup>1,3</sup>, Shaban R. M. Sayed<sup>4</sup>, Mahmoud E. S. Soliman<sup>5</sup>, Muhammad Naeem Ahmed<sup>6</sup>, Mohamed Khaled Abd El-Rahman<sup>7</sup> and Tamer Shoeib<sup>8\*</sup>

<sup>1</sup> Computational Chemistry Laboratory, Chemistry Department, Faculty of Science, Minia University, Minia 61519, Egypt

<sup>2</sup> School of Health Sciences, University of KwaZulu-Natal, Westville Campus, Durban 4000, South Africa

<sup>3</sup> Basic and Clinical Medical Science Department, Faculty of Dentistry, Deraya University, New Minya 61768, Egypt

<sup>4</sup> Department of Botany and Microbiology, College of Science, King Saud University, P.O. Box 2455, Riyadh 11451, Saudi Arabia

<sup>5</sup> Molecular Bio-Computation and Drug Design Research Laboratory, School of Health Sciences, University of KwaZulu-Natal, Westville Campus, Durban 4000, South Africa

<sup>6</sup> Department of Chemistry, The University of Azad Jammu and Kashmir, Muzaffarabad 13100, Pakistan

<sup>7</sup> Department of Chemistry and Chemical Biology, Harvard University, 12 Oxford Street, Cambridge, MA 02138, USA

<sup>8</sup> Department of Chemistry, The American University in Cairo, New Cairo 11835, Egypt

\* Corresponding author: Mahmoud A. A. Ibrahim: [m.ibrahim@compchem.net](mailto:m.ibrahim@compchem.net) and Tamer Shoeib: [t.shoeib@aucegypt.edu](mailto:t.shoeib@aucegypt.edu)

Cartesian atomic coordinatesFor  $\text{NH}_3 \cdots \text{XO}_3$  Complexes $\text{NH}_3 \cdots \text{ClO}_3$ 

|    |             |            |             |
|----|-------------|------------|-------------|
| Cl | -0.63948200 | 2.38881800 | 0.00000000  |
| O  | -0.27859000 | 3.80379000 | 0.00000000  |
| O  | -0.27827700 | 1.68141300 | 1.22535800  |
| O  | -0.27827700 | 1.68141200 | -1.22535800 |
| N  | -3.44158700 | 2.38892500 | 0.00000000  |
| H  | -3.81485200 | 1.44769800 | 0.00000000  |
| H  | -3.81472600 | 2.85958900 | -0.81515500 |
| H  | -3.81472600 | 2.85958900 | 0.81515500  |

S\*\*2 value = 0.7516

 $\text{NH}_3 \cdots \text{BrO}_3$ 

|    |             |             |             |
|----|-------------|-------------|-------------|
| Br | -0.79626200 | 1.33341300  | 0.00000000  |
| O  | -0.36633000 | 2.10951600  | -1.34430600 |
| O  | -0.36632900 | 2.10951600  | 1.34430700  |
| O  | -0.36608700 | -0.21935500 | 0.00000000  |
| N  | -3.63583800 | 1.33340100  | 0.00000000  |
| H  | -4.00763200 | 2.27562800  | 0.00000000  |
| H  | -4.00763000 | 0.86228900  | 0.81599500  |
| H  | -4.00763000 | 0.86228900  | -0.81599400 |

S\*\*2 value = 0.7547

 $\text{NH}_3 \cdots \text{IO}_3$ 

|   |             |             |             |
|---|-------------|-------------|-------------|
| I | -3.85918200 | 0.94781900  | -0.00580000 |
| O | -3.42706700 | 2.00064400  | 1.36630500  |
| O | -3.00996700 | -0.61929600 | 0.02359800  |
| O | -5.61981400 | 0.78270000  | -0.23053900 |
| N | -2.88551600 | 2.32389900  | -2.38934700 |
| H | -3.08728600 | 1.79539700  | -3.23026100 |
| H | -1.88250400 | 2.46437300  | -2.35199100 |
| H | -3.31644100 | 3.23539600  | -2.49249500 |

S\*\*2 value = 0.7589

**For  $\cdot\text{XO}_3\cdots\text{NH}_3$  Complexes** $\cdot\text{ClO}_3\cdots\text{NH}_3$ 

|    |             |            |             |
|----|-------------|------------|-------------|
| Cl | -0.43819400 | 2.39103100 | 0.00033500  |
| O  | -0.09871700 | 3.81176200 | -0.00015600 |
| O  | -0.10119000 | 1.68034400 | 1.23126500  |
| O  | -0.10177400 | 1.67963900 | -1.23034400 |
| N  | 2.46446900  | 2.38697500 | -0.00029000 |
| H  | 2.83639300  | 1.44565800 | -0.00008100 |
| H  | 2.83899500  | 2.85684800 | 0.81418000  |
| H  | 2.83883300  | 2.85642600 | -0.81507800 |

S\*\*2 value = 0.7521

 $\cdot\text{BrO}_3\cdots\text{NH}_3$ 

|    |             |            |             |
|----|-------------|------------|-------------|
| Br | -0.57482700 | 1.33345700 | 0.00022400  |
| O  | -0.19202300 | 0.55082200 | 1.35478900  |
| O  | -0.19189300 | 0.55168200 | -1.35483700 |
| O  | -0.19299400 | 2.89808600 | 0.00073900  |
| N  | 2.26631300  | 1.33315200 | -0.00014000 |
| H  | 2.63543300  | 0.39072300 | -0.00075200 |
| H  | 2.63819000  | 1.80320600 | 0.81544100  |
| H  | 2.63705900  | 1.80379300 | -0.81590400 |

S\*\*2 value = 0.7553

 $\cdot\text{IO}_3\cdots\text{NH}_3$ 

|   |             |             |             |
|---|-------------|-------------|-------------|
| I | -3.98923100 | 0.75933100  | 0.31912000  |
| O | -3.49109100 | 1.93165100  | 1.57233200  |
| O | -3.05093800 | -0.75698300 | 0.20143100  |
| O | -5.73099400 | 0.67352700  | -0.07171900 |
| N | -4.81950300 | -0.40934800 | 2.34249800  |
| H | -5.25603100 | -1.28365600 | 2.07479000  |
| H | -5.49984400 | 0.17168200  | 2.81807000  |
| H | -4.04671900 | -0.60012900 | 2.96938100  |

S\*\*2 value = 0.7560

### For $\text{NH}_3 \cdots \text{XO}_3 \cdots \text{NH}_3$ Complexes

#### $\text{NH}_3 \cdots \text{ClO}_3 \cdots \text{NH}_3$

|    |             |            |             |
|----|-------------|------------|-------------|
| Cl | -0.55306400 | 2.38890800 | 0.00015300  |
| O  | -0.20428700 | 3.80808200 | 0.00084700  |
| O  | -0.20454300 | 1.67878900 | 1.22896000  |
| O  | -0.20430200 | 1.67984600 | -1.22919200 |
| N  | 2.44013600  | 2.38868600 | -0.00015100 |
| H  | 2.81396000  | 1.44821200 | -0.00066400 |
| H  | 2.81439200  | 2.85835600 | 0.81443900  |
| H  | 2.81417700  | 2.85914600 | -0.81438500 |
| N  | -3.49127800 | 2.38894600 | -0.00004900 |
| H  | -3.86822200 | 1.44927300 | -0.00051700 |
| H  | -3.86851900 | 2.85900400 | -0.81355500 |
| H  | -3.86860100 | 2.85823800 | 0.81386100  |

S\*\*2 value = 0.7518

#### $\text{NH}_3 \cdots \text{BrO}_3 \cdots \text{NH}_3$

|    |             |             |             |
|----|-------------|-------------|-------------|
| Br | -0.68940700 | 1.33389200  | -0.00424700 |
| O  | -0.28115900 | 2.11473200  | -1.35344300 |
| O  | -0.28800400 | 2.11279900  | 1.34814700  |
| O  | -0.28490000 | -0.22595500 | -0.00427700 |
| N  | 2.25060500  | 1.33334700  | 0.00123900  |
| H  | 2.62118000  | 2.27502100  | 0.00105400  |
| H  | 2.61982200  | 0.86328300  | -0.81533600 |
| H  | 2.62341400  | 0.86209000  | 0.81548800  |
| N  | -3.67542200 | 1.33295300  | 0.00054900  |
| H  | -4.05274900 | 2.27277300  | 0.00207200  |
| H  | -4.05007100 | 0.86209500  | 0.81514800  |
| H  | -4.05361900 | 0.86326000  | -0.81308200 |

S\*\*2 value = 0.7548

#### $\text{NH}_3 \cdots \text{IO}_3 \cdots \text{NH}_3$

|   |             |             |             |
|---|-------------|-------------|-------------|
| I | -3.95070400 | 0.83362200  | 0.18857500  |
| O | -3.51479000 | 2.02444800  | 1.45280100  |
| O | -2.97259900 | -0.66494000 | 0.12867100  |
| O | -5.69163000 | 0.67207600  | -0.19658300 |
| N | -2.93040700 | 2.24839000  | -2.26721400 |
| H | -3.09437800 | 1.70224400  | -3.10433000 |
| H | -1.93369100 | 2.41828800  | -2.20699800 |
| H | -3.38311300 | 3.14512100  | -2.39699200 |
| N | -4.77762900 | -0.34676200 | 2.24961500  |
| H | -5.18600800 | -1.23756100 | 1.99415700  |
| H | -5.47789400 | 0.22266000  | 2.70893100  |
| H | -4.00468900 | -0.50325300 | 2.88494500  |

S\*\*2 value = 0.7555
